# Supplementary material for: Accurate calculation of absolute free energy of binding for SHP2 allosteric inhibitors using free energy perturbation
Source: Royal Society of Chemistry journal article supplement (doi:10.1039/d2cp00405d), 2022-01-01
Supplement: d2cp00405d1.pdf [file d2cp00405d1.pdf]

# Supporting Information

## Accurate calculation of absolute free energy of binding for allosteric inhibitors using free energy perturbation

Li Liang<sup>a,1</sup>, Haichun Liu<sup>a,1</sup>, Guomeng Xing<sup>a</sup>, Chenglong Deng<sup>a</sup>, Yi Hua<sup>a</sup>, Rui Gu<sup>a</sup>,  
Tao Lu<sup>a,b,\*</sup>, Yadong Chen<sup>a,\*</sup> and Yanmin Zhang<sup>a,\*</sup>

<sup>a</sup>Laboratory of Molecular Design and Drug Discovery, School of Science, China  
Pharmaceutical University, 639 Longmian Avenue, Nanjing 211198, China

<sup>b</sup>State Key Laboratory of Natural Medicines, China Pharmaceutical University, 24  
Tongjiaxiang, Nanjing 210009, China

<sup>1</sup>The authors contributed equally to this work and be considered as co-first authors.

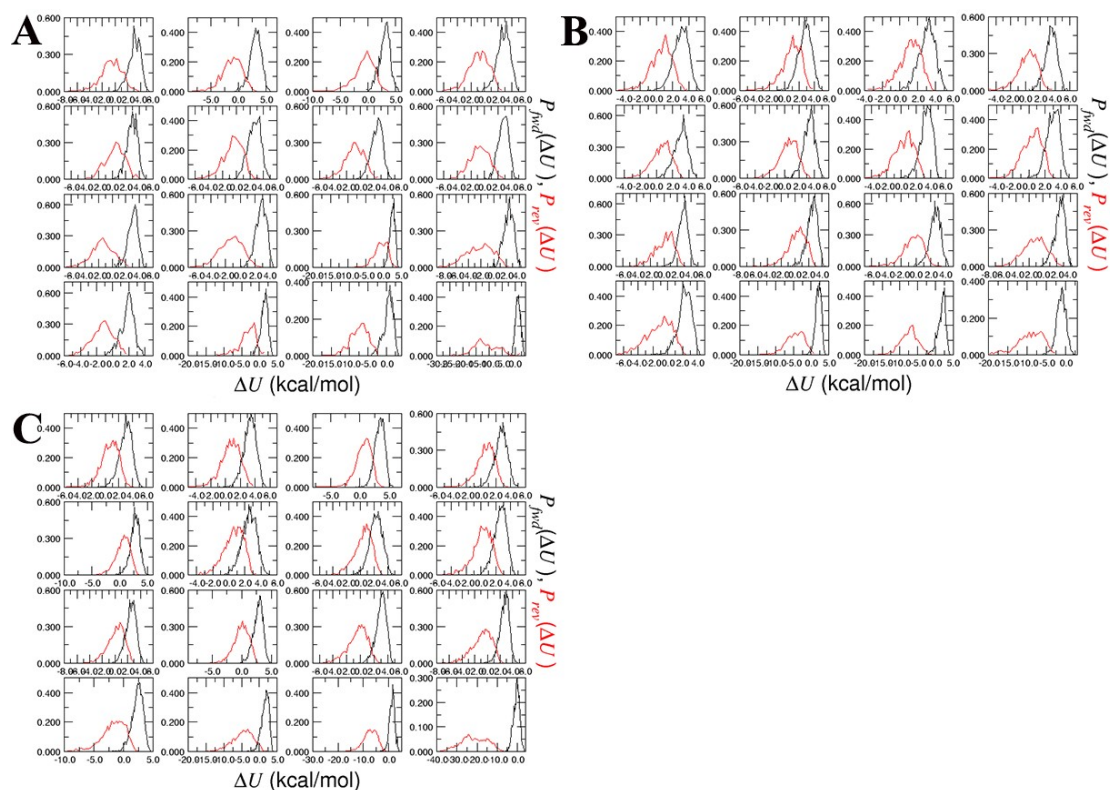

Figure S1. Probability distribution function underlying the binding of JAB3068 to SHP2. Shown in this Figure are the distributions characterizing the forward,  $P_{fwd}(\Delta U)$  (black solid lines) and the backward,  $P_{rev}(\Delta U)$  (red solid lines) transformations for (A) all 16 intermediate states in a 16-window stratification and 16 ps for each window strategy, (B) all 16 intermediate states in a 16-window stratification and 32 ps for each window strategy and (C) all 16 intermediate states in a 16-window stratification and 64 ps for each window strategy.

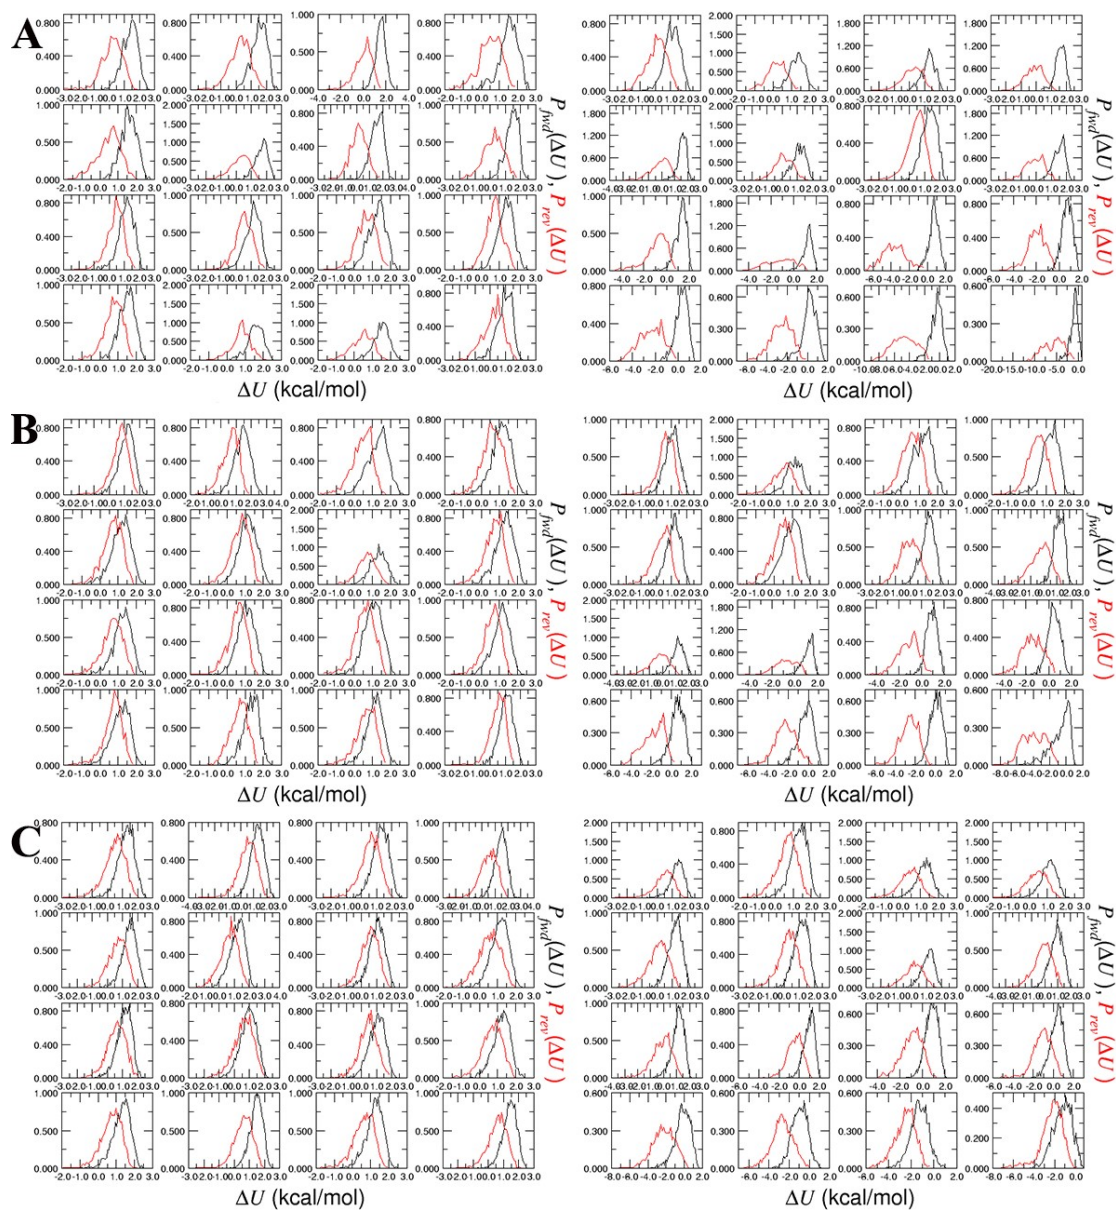

Figure S2. Probability distribution function underlying the binding of JAB3068 to

SHP2. Shown in this Figure are the distributions characterizing the forward,

$P_{fwd}(\Delta U)$  (black solid lines) and the backward,  $P_{rev}(\Delta U)$  (red solid lines)

transformations for (A) all 32 intermediate states in a 32-window stratification and 16

ps for each window strategy, (B) all 32 intermediate states in a 32-window

stratification and 32 ps for each window strategy and (C) all 32 intermediate states in

a 32-window stratification and 64 ps for each window strategy.

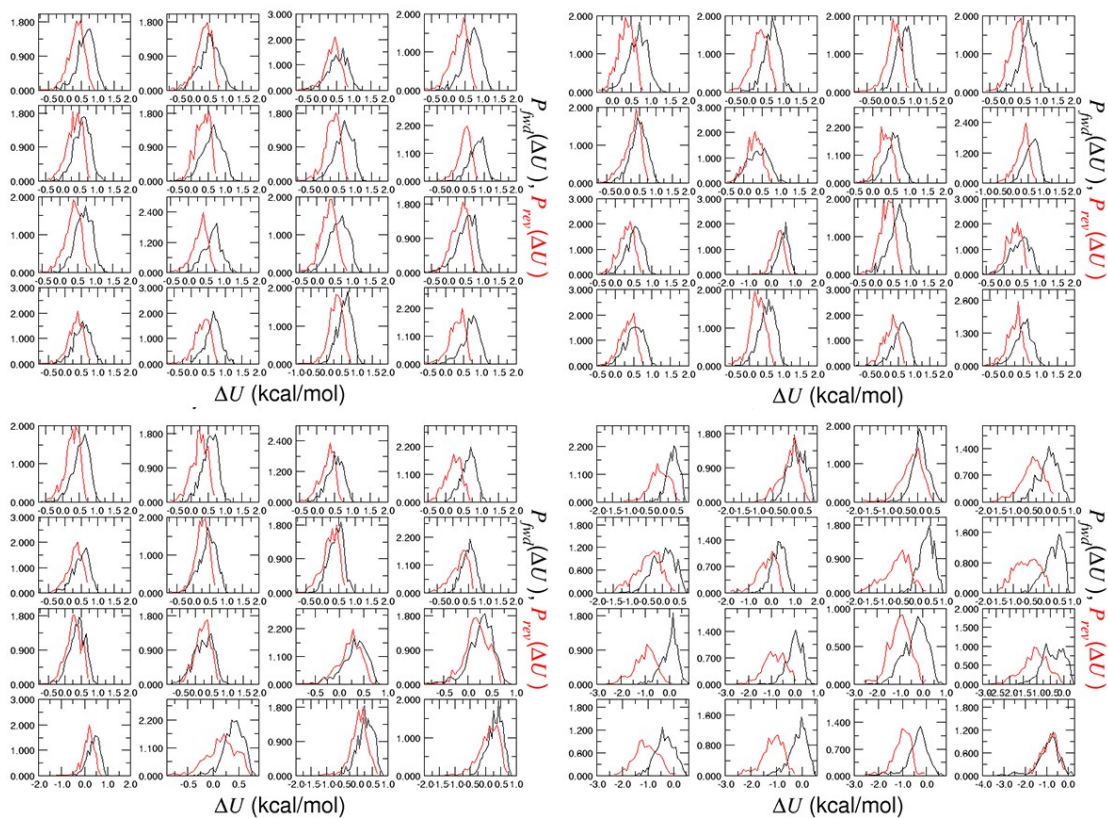

Figure S3. Probability distribution function underlying the binding of JAB3068 to SHP2. Shown in this Figure are the distributions characterizing the forward,  $P_{fwd}(\Delta U)$  (black solid lines) and the backward,  $P_{rev}(\Delta U)$  (red solid lines) transformations for all 64 intermediate states in a 64-window stratification and 16 ps for each window strategy.

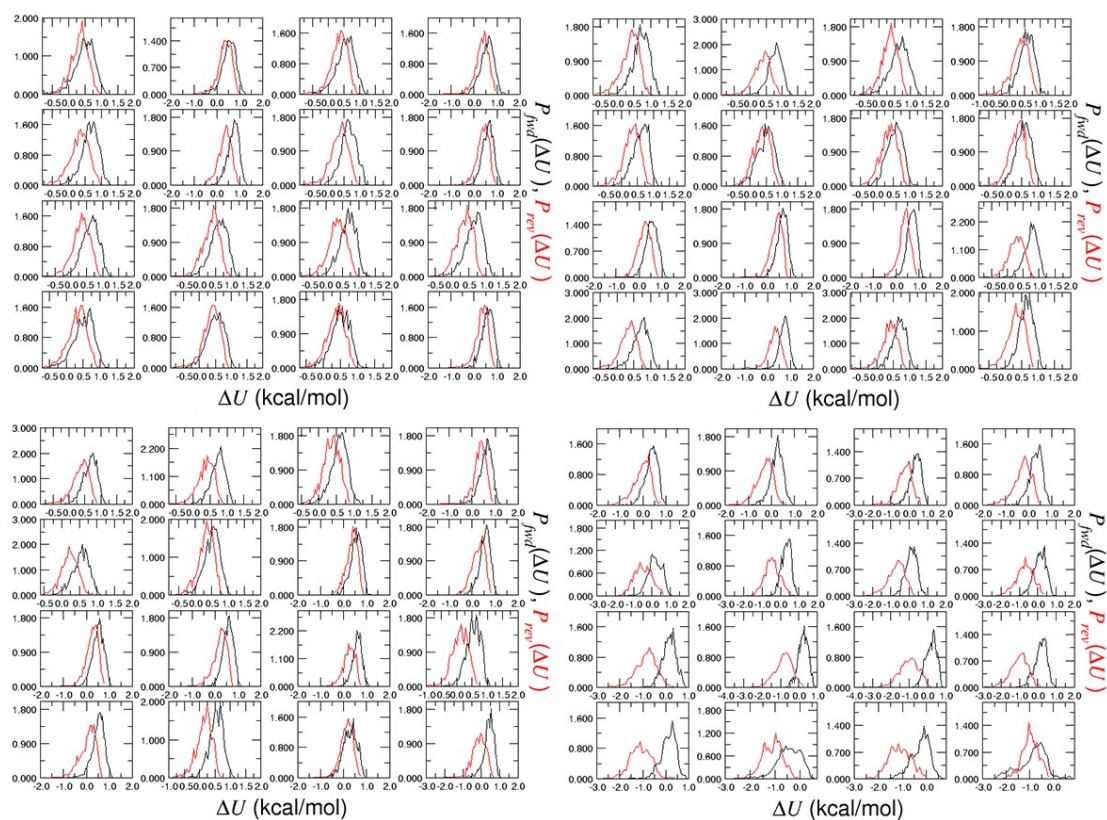

Figure S4. Probability distribution function underlying the binding of JAB3068 to SHP2. Shown in this Figure are the distributions characterizing the forward,  $P_{fwd}(\Delta U)$  (black solid lines) and the backward,  $P_{rev}(\Delta U)$  (red solid lines) transformations for all 64 intermediate states in a 64-window stratification and 32 ps for each window strategy.

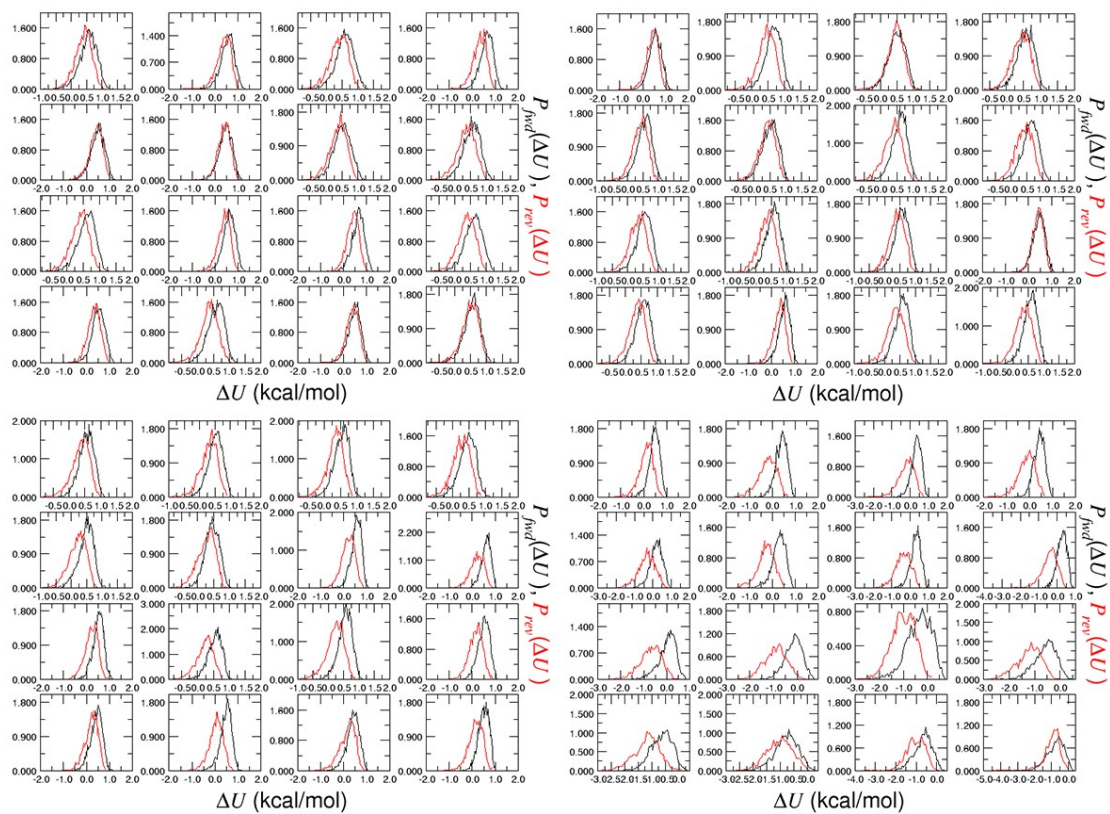

Figure S5. Probability distribution function underlying the binding of JAB3068 to SHP2. Shown in this Figure are the distributions characterizing the forward,  $P_{fwd}(\Delta U)$  (black solid lines) and the backward,  $P_{rev}(\Delta U)$  (red solid lines) transformations for all 64 intermediate states in a 64-window stratification and 64 ps for each window strategy.

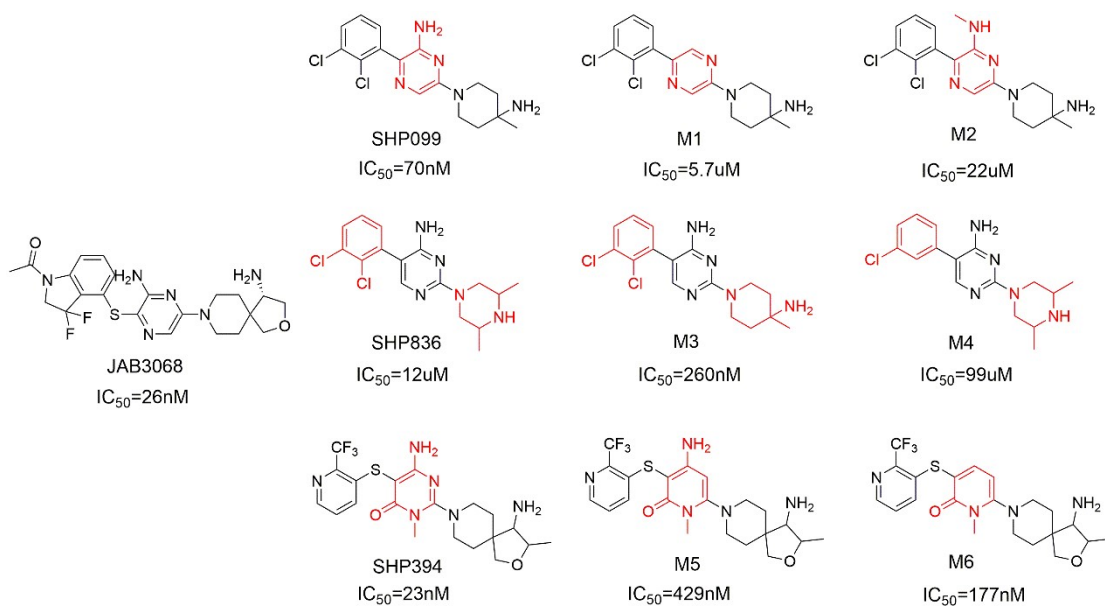

Figure S6. Structures and biological activity values of SHP2 allosteric inhibitors

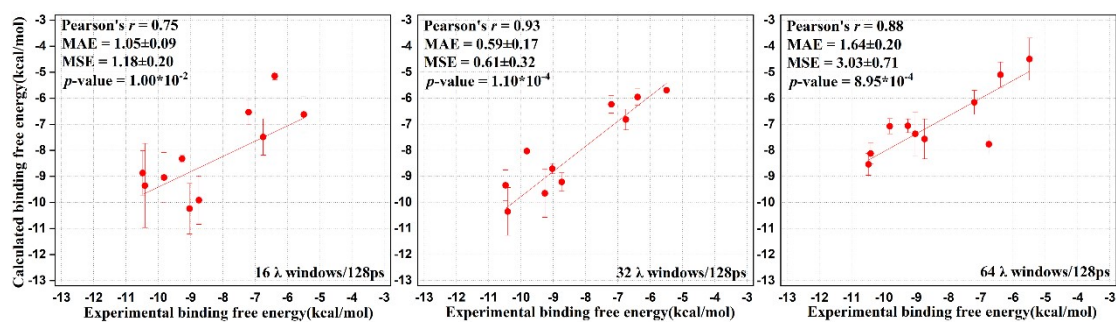

Figure S7 Correlation and  $p$ -value between experimental and calculated average affinities by FEP method under 16  $\lambda$  windows/128ps, 32  $\lambda$  windows/128ps and 64  $\lambda$  windows/128ps sampling strategies. A smaller  $p$ -value means that correlation between experimental and calculated values is more significant. MAE (mean absolute error) and MSE (mean square error) represent the abbreviations for mean absolute error and mean square error, respectively. MAE and MSE are in kcal mol<sup>-1</sup>. Error bars represent the standard error of mean across the five repeated calculations.



Table S1 RMSD values (Å) obtained by cross-docking study

| <b>PDB</b><br><b>Ligands</b> | <b>5EHP</b> | <b>5EHR</b> | <b>6MD7</b> | <b>6MD9</b> | <b>6MDA</b> | <b>6MDB</b> | <b>6MDC</b> | <b>6MDD</b> |
|------------------------------|-------------|-------------|-------------|-------------|-------------|-------------|-------------|-------------|
| <b>5EHP</b>                  | 0.21        | 7           | 1.31        | 1.85        | 1.77        | 0.8         | 0.66        | 2.66        |
| <b>5EHR</b>                  | 0.45        | 0.27        | 1.76        | 1.18        | 1.41        | 0.83        | 0.32        | 5.36        |
| <b>6MD7</b>                  | 2.26        | 12.51       | 0.41        | 1.39        | 3.13        | 1.23        | 2.23        | 6.83        |
| <b>6MD9</b>                  | 1.66        | 1.79        | 1.37        | 0.58        | 1.71        | 1.72        | 1.34        | 5.55        |
| <b>6MDA</b>                  | 1.04        | 2.68        | 1.31        | 0.61        | 0.24        | 0.86        | 1.3         | 8.63        |
| <b>6MDB</b>                  | 0.61        | 1.91        | 1.9         | 1.73        | 0.86        | 0.29        | 1.11        | 5.45        |
| <b>6MDC</b>                  | 1.27        | 8.45        | 6.49        | 2.3         | 5.42        | 2.73        | 1.12        | 11.59       |
| <b>6MDD</b>                  | 2.56        | 2.48        | 2.09        | 2.16        | 0.83        | 1.11        | 7.38        | 0.24        |

Table S2 Binding free energy of MM/PBSA calculation (kcal mol<sup>-1</sup>).

| Inhibitors | Experimental <sup>*</sup> | MM/PBSA     |
|------------|---------------------------|-------------|
| JAB3068    | -10.41                    | -18.81±6.61 |
| SHP099     | -9.82                     | -13.38±4.01 |
| SHP836     | -6.75                     | -7.70±4.73  |
| SHP394     | -10.48                    | -27.31±7.17 |
| M1         | -7.2                      | -10.31±3.78 |
| M2         | -6.39                     | -10.36±4.60 |
| M3         | -9.03                     | -10.17±6.31 |
| M4         | -5.49                     | -6.16±6.72  |
| M5         | -8.74                     | -12.64±6.65 |
| M6         | -9.26                     | -12.41±7.34 |

The asterisk (\*) denotes the following: the experimental binding free energy was estimated using  $\Delta G = (RT \ln IC_{50})/4285.8518$  with T = 300 K.

Table S3 Pearson correlation (Pearson's  $r$ ) for five single FEP calculations under different sampling strategies.

| Windows/time | FEP1 | FEP2  | FEP3 | FEP4 | FEP5 |
|--------------|------|-------|------|------|------|
| 16/16        | 0.06 | -0.02 | 0.79 | 0.33 | 0.04 |
| 16/32        | 0.18 | 0.67  | 0.86 | 0.07 | 0.53 |
| 16/64        | 0.59 | 0.57  | 0.56 | 0.73 | 0.47 |
| 32/16        | 0.52 | 0.43  | 0.60 | 0.40 | 0.35 |
| 32/32        | 0.86 | 0.73  | 0.16 | 0.81 | 0.71 |
| 32/64        | 0.91 | 0.78  | 0.80 | 0.78 | 0.85 |
| 64/16        | 0.70 | 0.49  | 0.83 | 0.78 | 0.67 |
| 64/32        | 0.73 | 0.64  | 0.68 | 0.76 | 0.80 |
| 64/64        | 0.55 | 0.77  | 0.73 | 0.69 | 0.79 |

Table S4  $p$ -value of independent samples t-test on Pearson correlation.

| Windows/tim<br>e | 16/16        | 16/32 | 16/64        | 32/16        | 32/32 | 32/64        | 64/16        | 64/32        | 64/64        |
|------------------|--------------|-------|--------------|--------------|-------|--------------|--------------|--------------|--------------|
| 16/16            |              | 0.323 | 0.083        | 0.198        | 0.068 | <b>0.017</b> | <b>0.023</b> | <b>0.031</b> | <b>0.017</b> |
| 16/32            | 0.323        |       | 0.467        | 0.990        | 0.353 | 0.070        | 0.203        | 0.155        | 0.179        |
| 16/64            | 0.083        | 0.467 |              | 0.077        | 0.613 | <b>0.001</b> | 0.164        | <b>0.026</b> | 0.076        |
| 32/16            | 0.198        | 0.990 | 0.077        |              | 0.186 | <b>0.000</b> | <b>0.013</b> | <b>0.001</b> | <b>0.004</b> |
| 32/32            | 0.068        | 0.353 | 0.613        | 0.186        |       | 0.224        | 0.781        | 0.614        | 0.707        |
| 32/64            | <b>0.017</b> | 0.070 | <b>0.001</b> | <b>0.000</b> | 0.224 |              | 0.075        | <b>0.027</b> | <b>0.044</b> |
| 64/16            | <b>0.023</b> | 0.203 | 0.164        | <b>0.013</b> | 0.781 | 0.075        |              | 0.677        | 0.872        |
| 64/32            | <b>0.031</b> | 0.155 | <b>0.026</b> | <b>0.001</b> | 0.614 | <b>0.027</b> | 0.677        |              | 0.763        |
| 64/64            | <b>0.017</b> | 0.179 | 0.076        | <b>0.004</b> | 0.707 | <b>0.044</b> | 0.872        | 0.763        |              |
